# Supplementary material for: Hierarchical multi-level block copolymer patterns by multiple self-assembly
Source: Royal Society of Chemistry journal article supplement (doi:10.1039/c9nr00774a), 2019-01-01
Supplement: c9nr00774a1.pdf [file c9nr00774a1.pdf]

## Supporting Information

# Hierarchical Multi-Level Block Copolymer Patterns by Multiple Self-Assembly

*Hyunsung Jung<sup>1†</sup>, Won Ho Shin<sup>1†</sup>, Tae Wan Park<sup>1</sup>, Young Joong Choi<sup>1</sup>, Young Joon Yoon<sup>1</sup>, Sung Heum Park<sup>2,6</sup>, Jae-Hong Lim<sup>3</sup>, Jung-Dae Kwon<sup>3</sup>, Jung Woo Lee<sup>4</sup>, Se-Hun Kwon<sup>4</sup>, Gi Hun Seong<sup>5\*</sup>, Kwang Ho Kim<sup>4,6\*</sup>, and Woon Ik Park<sup>1,6\*</sup>*

<sup>1</sup>Electronic Convergence Materials Division, Korea Institute of Ceramic Engineering & Technology (KICET) 101 Soho-ro, Jinju 52851, Republic of Korea

<sup>2</sup>Department of Physics, Pukyong National University (PKNU), Busan 48547, Republic of Korea

<sup>3</sup>Surface Technology Division, Korea Institute of Materials Science (KIMS), Gyeongnam 51395, Republic of Korea

<sup>4</sup>Department of Materials Science and Engineering, Pusan National University (PNU), Pusan 46241, Republic of Korea

<sup>5</sup>Department of Bionano Engineering, Hanyang University, Ansan 15588, Republic of Korea

<sup>6</sup>Global Frontier R&D Center for Hybrid Interface Materials, Busan 46241, Republic of Korea

KEYWORDS: block copolymer, self-assembly, multi-patterning, double-dot pattern, pondering structure

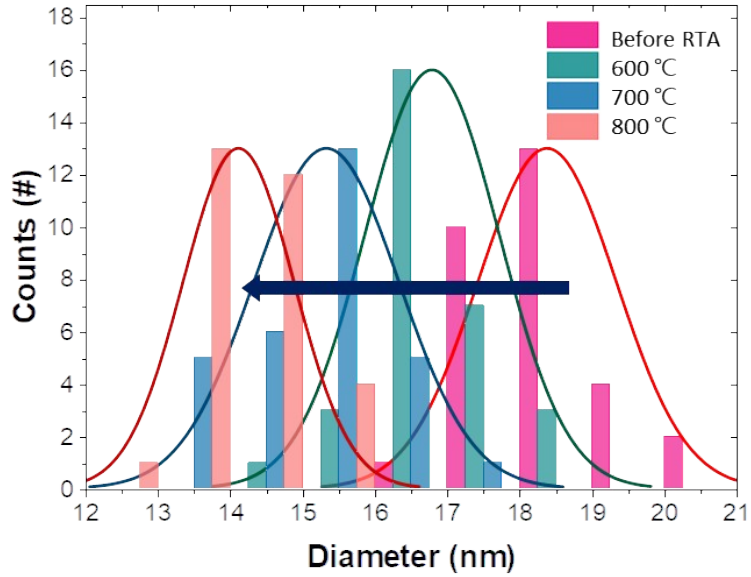

**Figure S1. Size distribution of SiO<sub>x</sub> dot patterns at various RTA temperatures.** Graph for size distribution of self-assembled SiO<sub>x</sub> dot (SD51) patterns. The pattern size decreases in proportion to the RTA temperature.

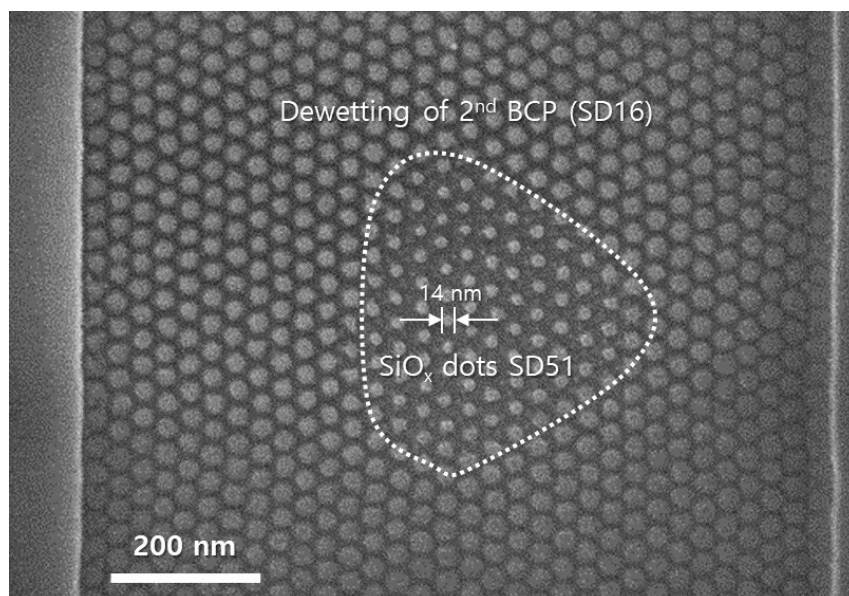

**Figure S2. Dewetting of the self-assembled second BCP (SD16) on a SiO<sub>x</sub> dot pattern.** A self-assembled SiO<sub>x</sub> dot pattern was used as a template to form a big-dot pattern of which the dewetting area indicates that the templated SiO<sub>x</sub> dots are converted into the big-size dot pattern through a second self-assembly of cylinder-forming SD16 BCP under a high vapor pressure of toluene.

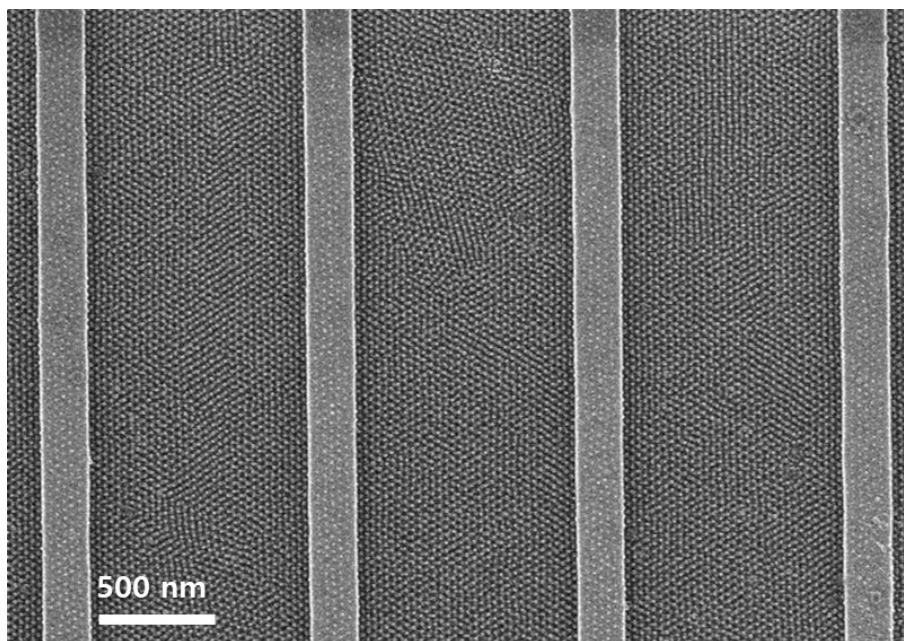

**Figure S3. Self-assembled double-dot SiO<sub>x</sub> pattern in a topographic Si template over a large area.** The self-assembled SD51 at 2.2 wt% annealed in pure toluene shows a multi-layer dot (double-dot) SiO<sub>x</sub> pattern.
